# Supplementary material for: RETRACTED ARTICLE: RNA editing of BFP, a point mutant of GFP, using artificial APOBEC1 deaminase to restore the genetic code
Source: PubMed Central journal article supplement (PMC7560856; doi:10.1038/s41598-020-74374-5), 2020-10-14

**RNA editing of BFP, a point mutant of GFP, using artificial APOBEC1 deaminase to restore the genetic code**

Sonali Bhakta<sup>1</sup>, Matomo Sakari<sup>1</sup>, and Toshifumi Tsukahara\*<sup>1</sup>

**Supplementary Data 1, S1:**

List of candidate genes involved in diseases caused by T-to-C mutations

**RNA editing of BFP, a point mutant of GFP, using artificial APOBEC1 deaminase to restore the genetic code**

Sonali Bhakta<sup>1</sup>, Matomo Sakari<sup>1</sup>, and Toshifumi Tsukahara\*<sup>1</sup>

**Supplementary Data 2, S2:**

RNA-sequencing (RNA-seq) reads from BFP\_1 HEK 293

**RNA editing of BFP, a point mutant of GFP, using artificial APOBEC1 deaminase to restore the genetic code**

Sonali Bhakta<sup>1</sup>, Matomo Sakari<sup>1</sup>, and Toshifumi Tsukahara\*<sup>1</sup>

**Supplementary Data 3, S3:**

RNA-sequencing (RNA-seq) from experimental HEK 293\_1

**RNA editing of BFP, a point mutant of GFP, using artificial APOBEC1 deaminase to restore the genetic code**

Sonali Bhakta<sup>1</sup>, Matomo Sakari<sup>1</sup>, and Toshifumi Tsukahara\*<sup>1</sup>

**Supplementary Data 4, S4:**

Calculation of editing efficiency based on peak area and peak height of the Sanger sequencing (N=5)



**RNA editing of BFP, a point mutant of GFP, using artificial APOBEC1 deaminase to restore the genetic code**  
**Sonali Bhakta<sup>1</sup>, Matomo Sakari<sup>1</sup>, and Toshifumi Tsukahara\*<sup>1</sup>**

**Supplementary Figure 5, S5:**

**Comparison of editing efficiency and off target effects when using gRNA of different lengths and different positions of the target in the guide**

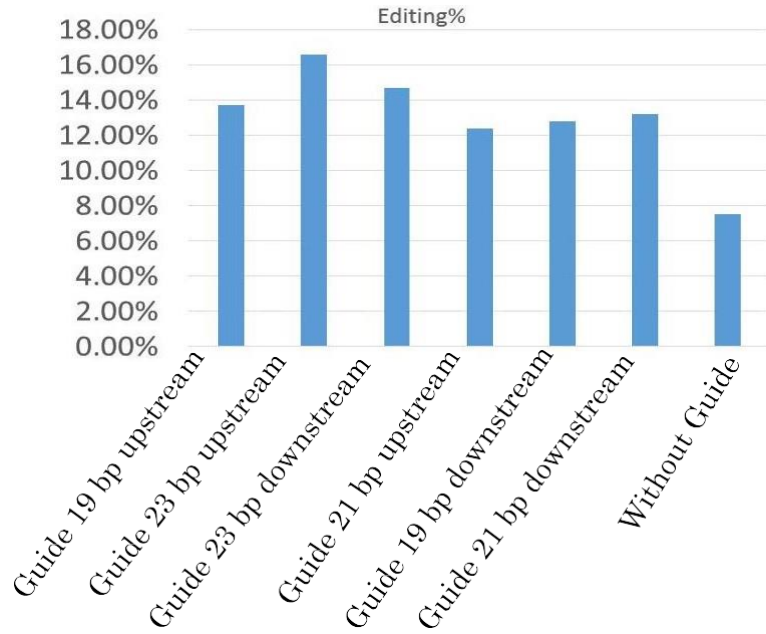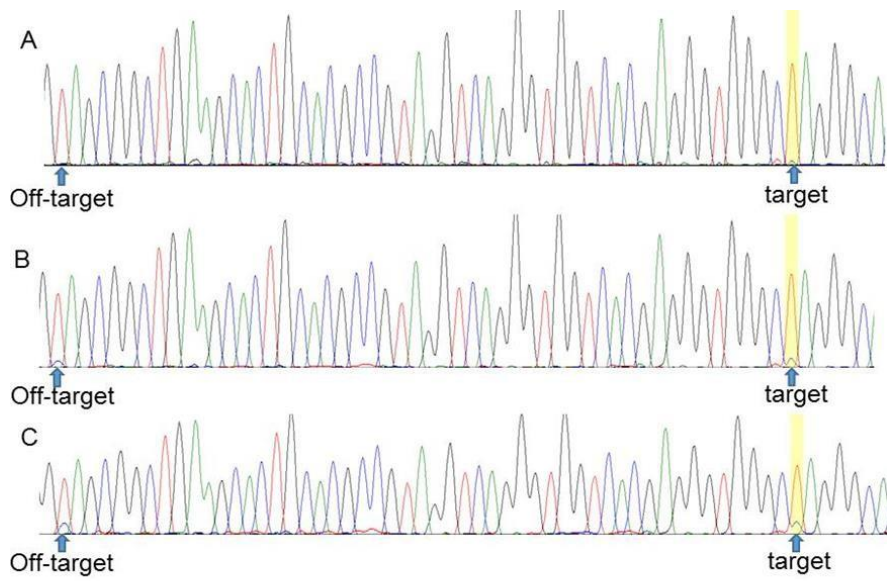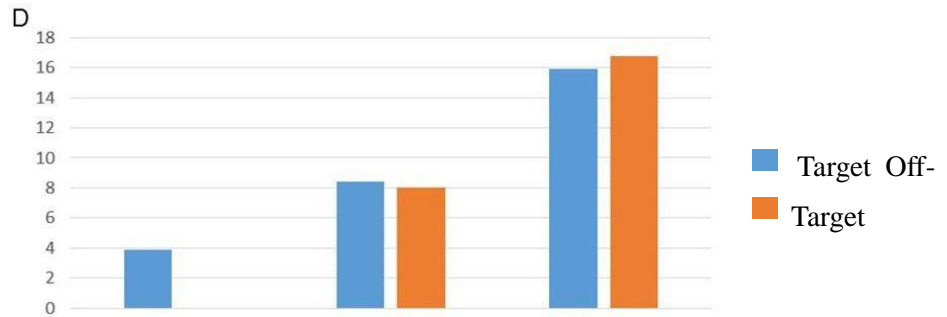

ADAR1-DD 250 ng  
Guide 19 bp  
upstream 500 ng

ADAR1-DD 250 ng  
Guide 21 bp  
upstream 500 ng

ADAR1-DD 250  
ng Guide 23 bp  
upstream 500 ng

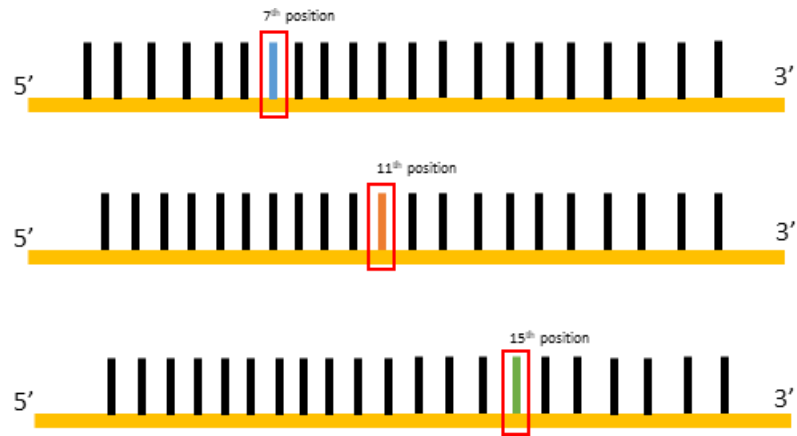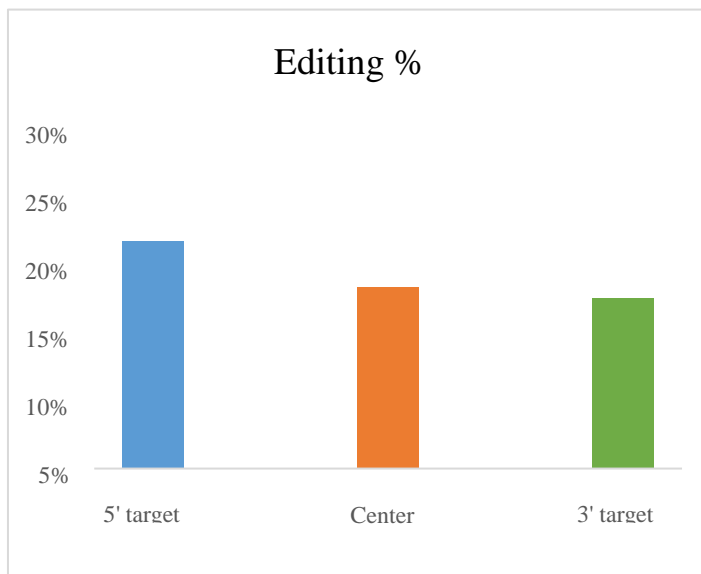

- 5' position of target in guideRNA
- Middle position of target in guideRNA
- 3' position of target in guideRNA



**RNA editing of BFP, a point mutant of GFP, using artificial APOBEC1  
deaminase to restore the genetic code**

**Sonali Bhakta<sup>1</sup>, Matomo Sakari<sup>1</sup>, and Toshifumi Tsukahara\*<sup>1</sup>**

**Supplementary Data 6, S6:**

**Mutation reads at different positions in BFP stably transformed in HEK 293  
cells- target/control**

| Pattern | Count |
|---------|-------|
| T>G     | 1536  |
| A>C     | 1469  |
| A>G     | 1107  |
| T>C     | 921   |
| G>T     | 634   |
| C>A     | 625   |
| T>A     | 534   |
| A>T     | 481   |
| G>A     | 405   |
| C>T     | 396   |
| G>C     | 361   |
| C>G     | 298   |

| Pattern | Count |
|---------|-------|
| AA>GG   | 69    |
| TT>CC   | 41    |
| GA>TT   | 17    |
| AG>CC   | 15    |
| CT>GG   | 12    |
| AG>TT   | 9     |
| GA>CC   | 9     |
| CC>GG   | 6     |
| TC>AA   | 5     |
| AA>CC   | 5     |
| CT>AA   | 5     |
| TC>GG   | 5     |
| AT>TG   | 4     |
| GG>CC   | 4     |
| GT>CG   | 4     |
| AC>CG   | 4     |
| AAA>GGG | 3     |
| TG>AT   | 3     |
| TT>AA   | 3     |
| GG>AA   | 3     |
| AT>CG   | 3     |
| AT>CC   | 3     |
| TT>CG   | 3     |
| CG>AC   | 2     |
| GC>TA   | 2     |
| CA>AT   | 2     |
| AT>CA   | 2     |
| TA>GG   | 2     |
| CA>TG   | 2     |
| GA>TC   | 2     |
| GG>TT   | 2     |
| CC>TG   | 2     |

| Pattern   | Count |
|-----------|-------|
| TTT>AAA   | 1     |
| TA>CC     | 1     |
| TT>GG     | 1     |
| TTT>CCC   | 1     |
| TC>GA     | 1     |
| GAA>CGG   | 1     |
| AA>TT     | 1     |
| TC>CT     | 1     |
| AT>GG     | 1     |
| TC>GT     | 1     |
| CT>GC     | 1     |
| AAAA>GGCC | 1     |
| CTC>AAA   | 1     |
| CT>TA     | 1     |
| AT>GA     | 1     |
| ATC>CAA   | 1     |
| CAC>TGG   | 1     |
| TG>GC     | 1     |
| TC>CG     | 1     |
| AC>TG     | 1     |
| CG>GC     | 1     |
| AGA>TTT   | 1     |
| AC>CA     | 1     |
| GA>AG     | 1     |
| CC>TT     | 1     |
| GAT>TTG   | 1     |
| GA>AC     | 1     |
| TG>CC     | 1     |
| GA>AT     | 1     |
| GT>AG     | 1     |
| CA>GG     | 1     |
| GT>CC     | 1     |
| AA>CG     | 1     |

Targeted editing:

Bystandard editing:

a. Forward primer (Sense primer)

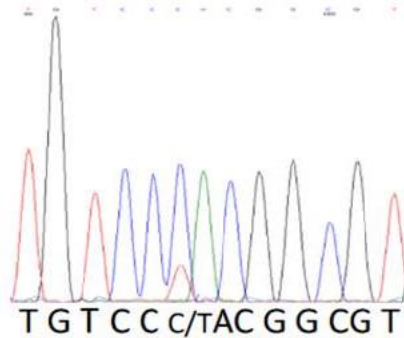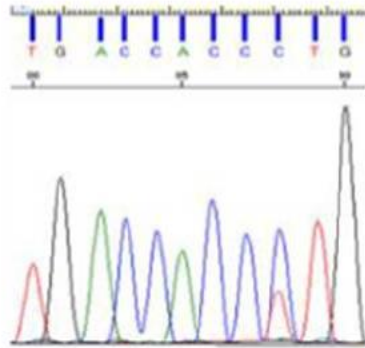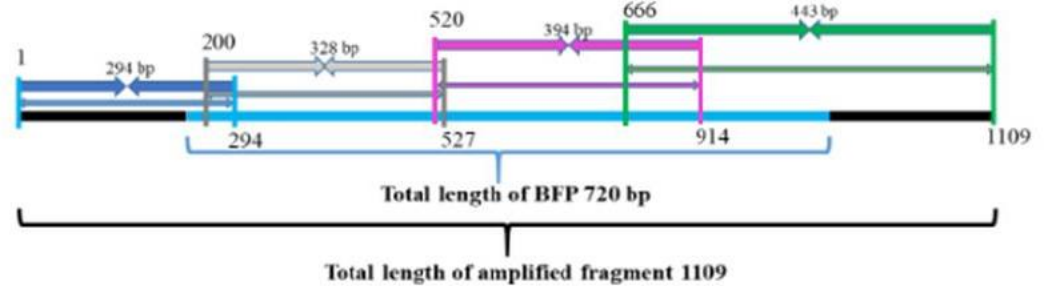

| Oligos                                                                    | Position range | Total amplified length | Position of off-target                                                | Target editing                              |
|---------------------------------------------------------------------------|----------------|------------------------|-----------------------------------------------------------------------|---------------------------------------------|
| <b>Oligo 1</b><br>Fw: GCTTATCGAAATTAATACG<br>Rev: CACGGGCAGCTTGCCGGTGGT   | 1-294          | 294 base pair          | No off target effect                                                  | There was no targeted position to be edited |
| <b>Oligo 2</b><br>Fw: GCCACAAGITCAGCGTGTC<br>Rev: TCCTCCTTGAAGTCGATGC     | 200-527        | 328 base pair          | Only the difference between the target and off target nucleotide is 5 |                                             |
| <b>Oligo 3</b><br>Fw: ACAACAGCCACAACGTCTATA<br>Rev: AAGGCACAOTCGAGGCTGATC | 520-914        | 394 base pair          | No off target effect                                                  | There was no targeted position to be edited |
| <b>Oligo 4</b><br>Fw: GACCACTACCAGCAGAACACC<br>Rev: CAGCATGCCTGCTAATTGCTT | 666-1109       | 443 base pair          | No off target effect                                                  | There was no targeted position to be edited |

**Supplementary Figure, S6:** Whole BFP sequencing by placing different primers at different positions and also there were overlapped positions. In total 1109bp were amplified, among these at the position of 200-527 only at this position one off-target event was found, which was located upstream of the targeted C which was to be edited.

**RNA editing of BFP, a point mutant of GFP, using artificial APOBEC1 deaminase to restore the genetic code**

**Sonali Bhakta<sup>1</sup>, Matomo Sakari<sup>1</sup>, and Toshifumi Tsukahara\*<sup>1</sup>**

**Supplementary Data 7, S7:**

**Mutation reads at different positions in restored GFP in HEK 293 cells-tested/  
experimental**

| Pattern | Count |
|---------|-------|
| T >G    | 2401  |
| A >C    | 2355  |
| T >C    | 1972  |
| A >G    | 1915  |
| G >T    | 1745  |
| C >A    | 1698  |
| G >A    | 1271  |
| C >T    | 1238  |
| T >A    | 1134  |
| A >T    | 1042  |
| C >G    | 702   |
| G >C    | 648   |

| Pattern   | Count |
|-----------|-------|
| GG>AT     | 1     |
| TG>CC     | 1     |
| TG>GT     | 1     |
| CTG>AAT   | 1     |
| TA>AT     | 1     |
| CG>GC     | 1     |
| AAAA>TTTT | 1     |
| CC>AA     | 1     |
| CA>GG     | 1     |
| GC>CA     | 1     |
| CA>GT     | 1     |
| TC>AT     | 1     |
| CCT>GGG   | 1     |

| Pattern | Count |
|---------|-------|
| AA >GG  | 58    |
| TT >CC  | 51    |
| GA >TT  | 31    |
| TC>AA   | 23    |
| CT >GG  | 20    |
| AG >CC  | 16    |
| AA >CC  | 14    |
| AG >TT  | 12    |
| AT >CA  | 10    |
| AT >TG  | 10    |
| CT>AA   | 9     |
| TC>GG   | 8     |
| CA>TG   | 8     |
| TG>CA   | 8     |
| GG>CC   | 7     |
| CC>GG   | 6     |
| AC>CG   | 6     |
| GA>CC   | 5     |
| TT>CG   | 5     |
| GT>>CG  | 4     |
| CA>AT   | 4     |
| CA>GC   | 3     |
| AC>GT   | 3     |
| CT>TC   | 3     |
| TA>GG   | 3     |
| AAA>GG  | 3     |
| G       |       |
| AG>GC   | 3     |
| AA>TT   | 2     |
| AT>CC   | 2     |
| TC>CT   | 2     |
| TA>AC   | 2     |
| AT>GG   | 2     |
| GG>TT   | 2     |

| Pattern   | Count |
|-----------|-------|
| AAA>TTT   | 2     |
| TTT>CCC   | 2     |
| CT>GC     | 2     |
| GT>AA     | 2     |
| GC>AA     | 2     |
| AG>AA     | 2     |
| CA>TC     | 2     |
| GC>CT     | 2     |
| GC>AT     | 2     |
| GC>TT     | 2     |
| GG>AA     | 2     |
| TA>CC     | 2     |
| AA>TG     | 2     |
| GT>AC     | 2     |
| GTT>CCG   | 2     |
| TG>AC     | 2     |
| AT>CG     | 2     |
| AG>CA     | 2     |
| CC>TA     | 22    |
| TG>AT     | 2     |
| TG>AA     | 2     |
| TG>CT     | 2     |
| CT>TA     | 1     |
| CC>TG     | 1     |
| ACA>TTT   | 1     |
| GCT>TGG   | 1     |
| CG>AA     | 1     |
| CT>AC     | 1     |
| TT>GG     | 1     |
| GA>TG     | 1     |
| GA>AG     | 1     |
| CTCT>GCGG | 1     |
| CT>GA     | 1     |

| Pattern   | Count |
|-----------|-------|
| AA>CT     | 1     |
| CTC>AAA   | 1     |
| TT>AA     | 1     |
| GAT>TTG   | 1     |
| GC>TG     | 1     |
| CG>AT     | 1     |
| GA>TC     | 1     |
| GTT>CGG   | 1     |
| CC>AG     | 1     |
| TT>AG     | 1     |
| TC>GA     | 1     |
| AAG>GTT   | 1     |
| GT>CC     | 1     |
| TCG>AAA   | 1     |
| TA>CG     | 1     |
| GGG>CCC   | 1     |
| AG>GT     | 1     |
| CC>GT     | 1     |
| AGT>CTC   | 1     |
| CT>AG     | 1     |
| AGA>CCC   | 1     |
| CTC>GGG   | 1     |
| AGT>CCG   | 1     |
| TCT>AAA   | 1     |
| TA>GT     | 1     |
| CA>AC     | 1     |
| AC>TG     | 1     |
| CCCA>GGGT | 1     |
| TT>CA     |       |
| GT>TC     | 1     |
| ATC>CAA   | 1     |
| TT>GA     | 1     |
| GT>CA     | 1     |

# RNA editing of BFP, a point mutant of GFP, using artificial APOBEC1 deaminase to restore the genetic code

Sonali Bhakta<sup>1</sup>, Matomo Sakari<sup>1</sup>, and Toshifumi Tsukahara\*<sup>1</sup>

## Supplementary Figure 8, S8

Schematic diagram of the editing by guideRNA (Complementary to the target sequence) and APOBEC 1 deaminase

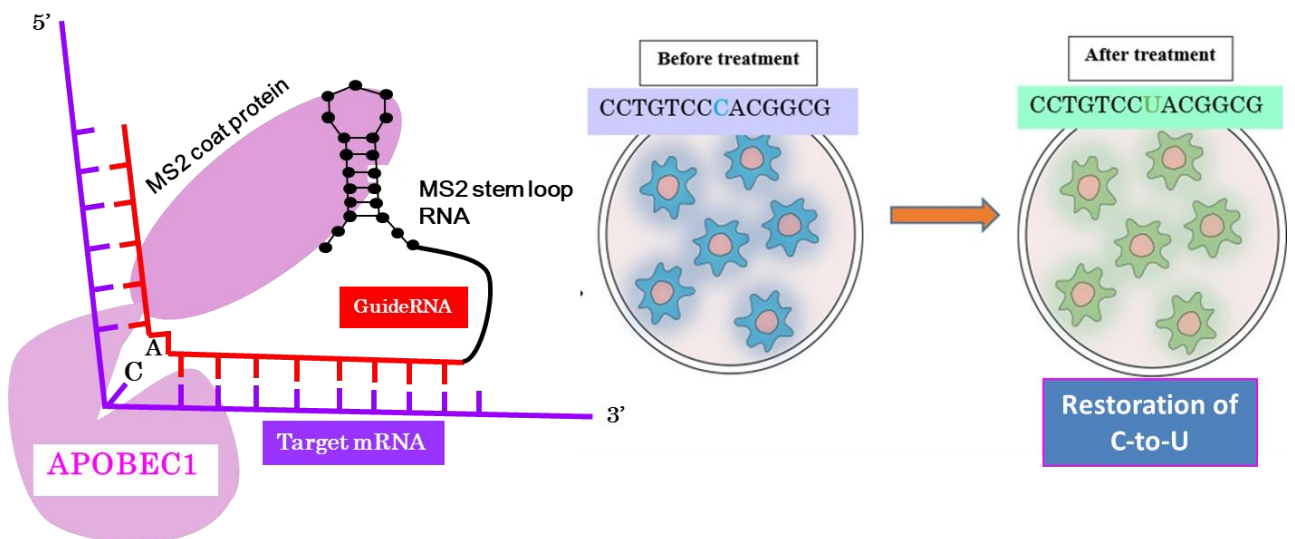

**RNA editing of BFP, a point mutant of GFP, using artificial APOBEC1 deaminase to restore the genetic code**

Sonali Bhakta<sup>1</sup>, Matomo Sakari<sup>1</sup>, and Toshifumi Tsukahara\*<sup>1</sup>

**Supplementary Data 9, S9:**

PCR-RFLP raw gel image without cropping

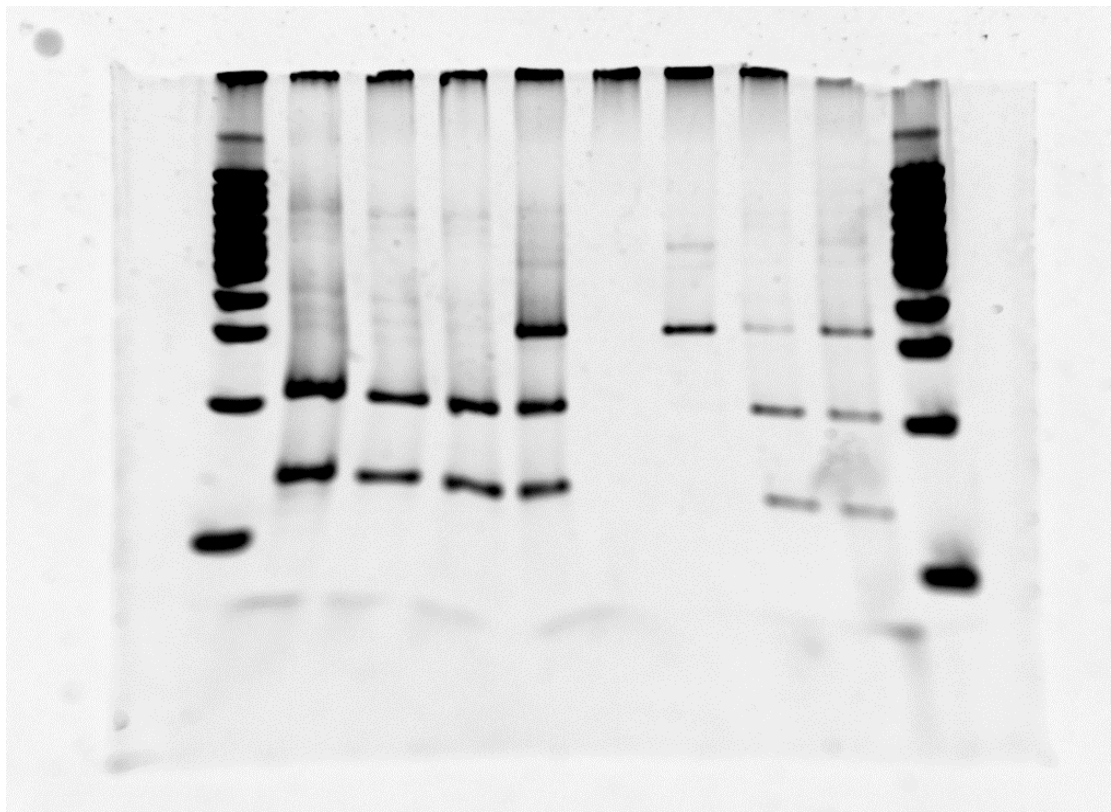

Supplement: 41598_2020_74374_MOESM1_ESM.pdf [file 41598_2020_74374_MOESM1_ESM.pdf]
